**S1 Table. The PEPIS running time for computing main effect kinship matrix (Ka, Kd) and full polygenic kinship matrix using the simulated data at various numbers of bins and individuals.**

**A. Fixing the number of Individuals at 1,000 while varying the numbers of bins from 1,000 to 40,000.**

|                  |            | Running time (seconds) for computing |                            |
|------------------|------------|--------------------------------------|----------------------------|
|                  |            | Ka, Kd                               | Ka, Kd, Kaa, Kad, Kda, Kdd |
| Individual=1,000 | Bin=1,000  | 87                                   | 66                         |
|                  | Bin=2,000  | 88                                   | 146                        |
|                  | Bin=4,000  | 95                                   | 345                        |
|                  | Bin=1,0000 | 322                                  | 2,056                      |
|                  | Bin=20,000 | 419                                  | 7,262                      |
|                  | Bin=40,000 | 545                                  | 29,322                     |

**B. Fixing the numbers of bins at 1,000 while varying the numbers of individuals from 1,000 to 40,000.**

|           |                   | Running time (seconds) for computing |                            |
|-----------|-------------------|--------------------------------------|----------------------------|
|           |                   | Ka, Kd                               | Ka, Kd, Kaa, Kad, Kda, Kdd |
| Bin=1,000 | Individual=1,000  | 57                                   | 63                         |
|           | Individual=2,000  | 70                                   | 130                        |
|           | Individual=4,000  | 158                                  | 427                        |
|           | Individual=10,000 | 739                                  | 2,453                      |
|           | Individual=20,000 | 2,763                                | 9,710                      |
|           | Individual=40,000 | 1,1131                               | 39,024                     |
