**S2 Table. The total running time of PEPIS for the epistatic effect analysis using the simulated data at various numbers of bins and individuals.**

**A: Fixing the numbers of individuals at 1,000 while varying the numbers of bins from 1,000 to 20,000.**

|                  |            | Epistatic Effect Analysis Running Time<br>(seconds) |
|------------------|------------|-----------------------------------------------------|
| Individual=1,000 | Bin=1,000  | 701                                                 |
|                  | Bin=2,000  | 1,140                                               |
|                  | Bin=4,000  | 1,949                                               |
|                  | Bin=10,000 | 7,901                                               |
|                  | Bin=20,000 | 28,356                                              |

**B: Fixing the numbers of bins at 1,000 while varying the numbers of individuals from 1,000 to 10,000.**

|          |                   | Epistatic Effect Analysis Running Time<br>(seconds) |
|----------|-------------------|-----------------------------------------------------|
| Bin=1000 | Individual=1,000  | 701                                                 |
|          | Individual=2,000  | 4,399                                               |
|          | Individual=4,000  | 35,885                                              |
|          | Individual=10,000 | 506,552                                             |
